# Supplementary material for: Blood levels of microRNAs associated with ischemic heart disease differ between Austrians and Japanese: a pilot study
Source: PubMed Central journal article supplement (PMC7423897; doi:10.1038/s41598-020-69332-0), 2020-08-12
Supplement: 41598_2020_69332_MOESM1_ESM.pdf [file 41598_2020_69332_MOESM1_ESM.pdf]

## Supplementary Figures 1 ~ 3

**Title:** Blood levels of microRNAs associated with ischemic heart disease differ between Austrians and Japanese: a pilot study

**Authors:** Ichiro Wakabayashi<sup>1</sup>, Ryoji Eguchi<sup>1</sup>, Yoko Sotoda<sup>2</sup>, Dirk von Lewinski<sup>3</sup>, Harald Sourij<sup>4</sup>, Takashi Daimon<sup>5</sup>, Klaus Groschner<sup>6</sup>, Peter P. Rainer<sup>3</sup>

**From:**

<sup>1</sup>Department of Environmental and Preventive Medicine, Hyogo College of Medicine, Nishinomiya, Hyogo 663-8501, Japan

<sup>2</sup>Department of Cardiovascular Surgery, Yamagata Saisei Hospital, Yamagata 990-8545, Japan

<sup>3</sup>Division of Cardiology, Medical University of Graz, Auenbruggerplatz 15, 8036 Graz, Austria

<sup>4</sup>Division of Endocrinology and Metabolism, Medical University of Graz, Auenbruggerplatz 15, 8036 Graz, Austria

<sup>5</sup>Department of Biostatistics, Hyogo College of Medicine, Nishinomiya, Hyogo 663-8501, Japan

<sup>6</sup>Gottfried Schatz Research Center for Cell Signaling, Metabolism and Aging. Medical University of Graz. Neue Stiftingtalstrasse 6/D04, 8010, Graz, Austria

**Corresponding author:**

Ichiro Wakabayashi, MD & PhD

Department of Environmental and Preventive Medicine,

Hyogo College of Medicine,

Mukogawa-cho 1-1, Nishinomiya, Hyogo 663-8501, Japan

Tel: +81-798-45-6561; Fax: +81-798-45-6563

E-mail: wakabaya@hyo-med.ac.jp

# Supplementary Figure 1

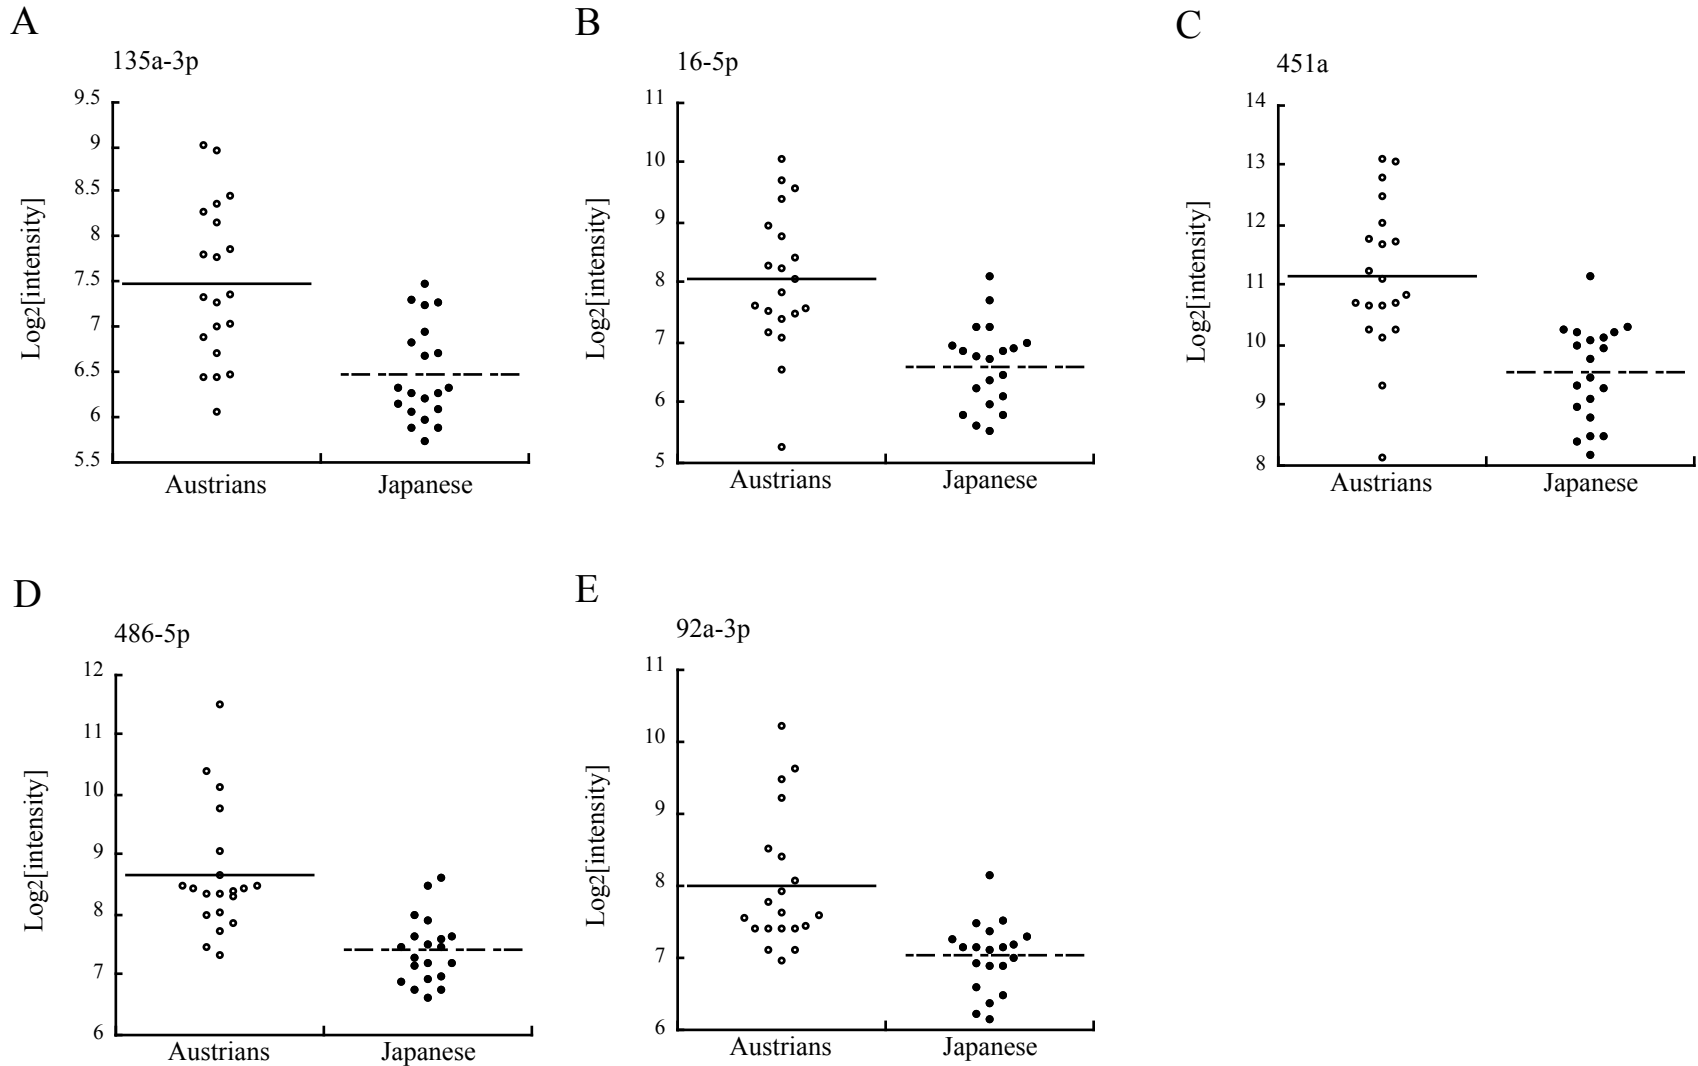

**Supplementary Figure 1.** Comparison of log<sub>2</sub>-transformed intensities of miR-135a-3p, miR-16-5p, miR-451a, miR-486-5p and miR-92a-3p in blood between Austrians and Japanese. Mean intensity levels are indicated by transverse bars.

## Supplementary Figure 2

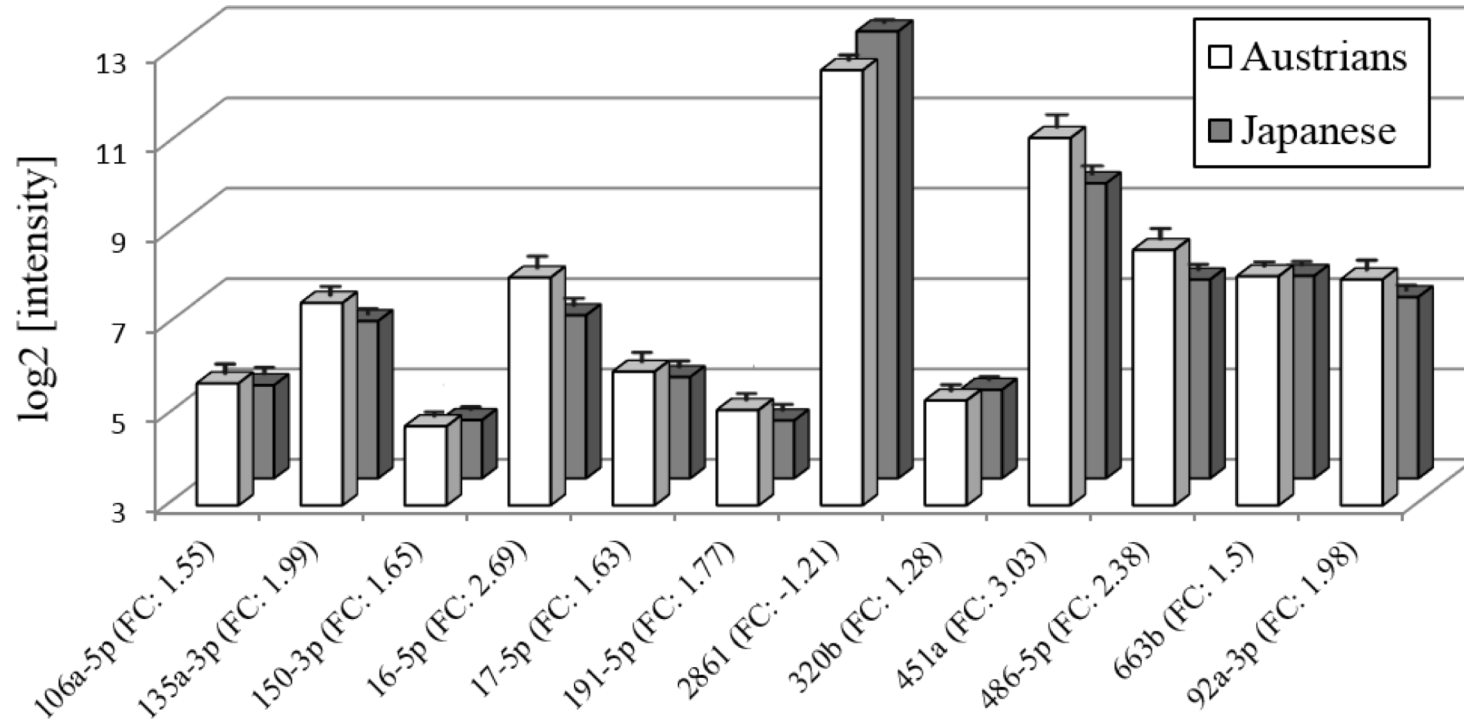

### Supplementary figure 2.

Comparison of mean log<sub>2</sub>-transformed intensities of expression of the 12 miRNAs in blood between Austrians and Japanese. FC, fold change. Means with standard errors of the intensities are shown.

## Supplementary Figure 3

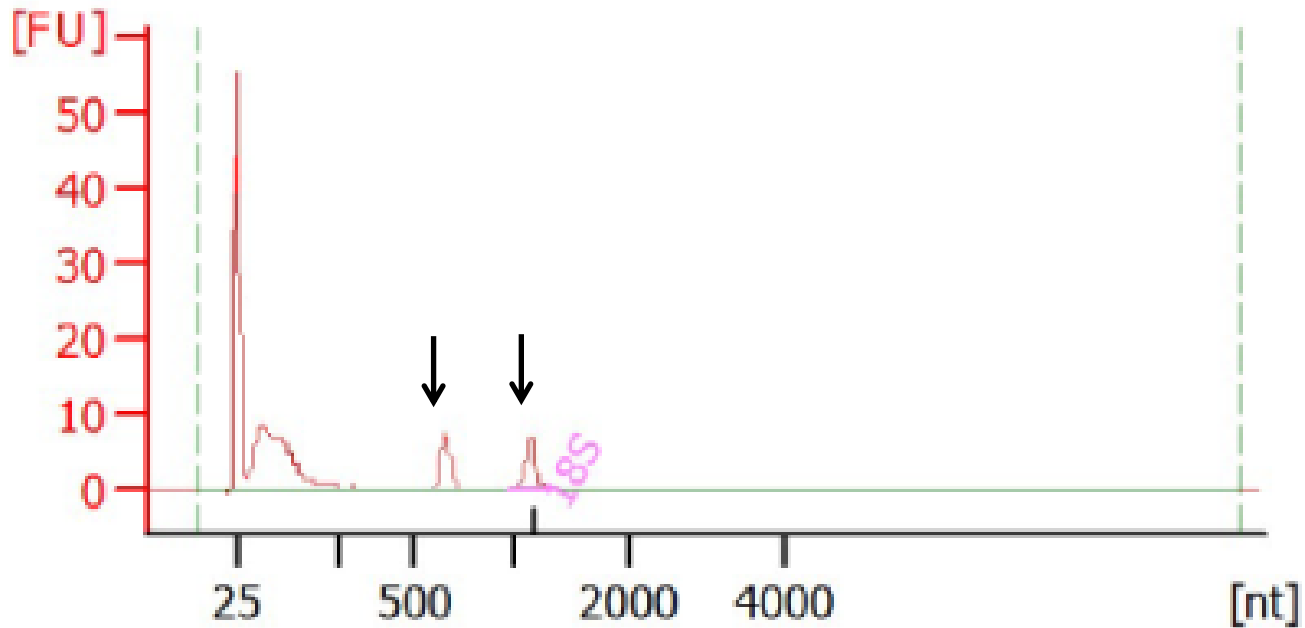

### Supplementary Figure 3.

A representative electropherogram resulting from Agilent 2100 Bioanalyzer analysis on total RNA extracted from serum of the subjects. Arbitrary fluorescence units (FU) are plotted as a function of RNA size in nucleotides (nt). The arrows in the figure indicate peaks by RNA spike-in controls.
